# Supplementary material for: Evaluation and Use of In-Silico Structure-Based Epitope Prediction with Foot-and-Mouth Disease Virus
Source: PLoS One. 2013 May 7;8(5):e61122. doi: 10.1371/journal.pone.0061122 (PMC3646828; doi:10.1371/journal.pone.0061122)
Supplement: Table S1 — Average diversity and RMSD of surface exposed residues, antigenic and predicted sites from all the serotypes evaluated. (XLSX) [file pone.0061122.s001.xlsx]

## Sheet: Supplementary file for paper.
Average diversity and RMSD of surface exposed residues, antigenic and predicted sites from all the serotypes evaluated*
* aligned to the reduced O1K structure
Average diversity on surface		Antigenic site average diversity	Predicted sites average diversity
53.0392		67.7551	64.4977
Average RMSD on surface		Antigenic site average RMSD	Predicted site average RMSD
1.0062		1.13048	1.04899
Reduced O1K	Antigenic or Predicted site	Surface?	Average diversity across serotypes	Average RMSD across serotypes
VP1:LYS 41		Yes	100	0.485607
VP1:VAL 42		Yes	7.58	0.670725
VP1:THR 43	Antigenic site	Yes	100	1.50119
VP1:PRO 44	Antigenic site	Yes	100	2.04826
VP1:GLN 45	Antigenic site	Yes	100	2.28753
VP1:ASN 46	Predicted site	Yes	100	2.27767
VP1:GLN 47	Predicted site	Yes	100	0.961546
VP1:ILE 48	Antigenic site	Yes	100	1.05857
VP1:ASN 49		Yes	100	0.571327
VP1:ILE 50		Yes	39.7	0.372482
VP1:ASP 52		Yes	10.91	0.52181
VP1:LEU 53		Yes	3.64	0.47556
VP1:MET 54		Yes	17.73	0.427718
VP1:GLN 55		Yes	53.18	0.571739
VP1:VAL 56		Yes	38.79	0.485534
VP1:PRO 57		Yes	100	0.702557
VP1:SER 58		Yes	85	0.551569
VP1:HIS 59		Yes	100	0.424517
VP1:ARG 67		Yes	2.12	0.323375
VP1:LYS 81		Yes	75.76	1.80333
VP1:HIS 82		Yes	100	0.511297
VP1:GLU 83	Predicted & Antigenic site	Yes	88.64	1.26474
VP1:GLY 84	Predicted site	Yes	100	1.98831
VP1:ASP 85		Yes	100	1.89077
VP1:THR 87		Yes	100	0.865522
VP1:PRO 94		Yes	0	0.326868
VP1:GLU 95		Yes	62.73	0.248596
VP1:LYS 96		Yes	100	0.767389
VP1:LEU 98		Yes	58.79	0.434195
VP1:ASP 99		Yes	100	0.874969
VP1:ASN 100		Yes	59.39	2.05826
VP1:THR 101		Yes	100	1.46283
VP1:THR 102		Yes	100	1.08619
VP1:THR 105		Yes	48.79	0.460946
VP1:HIS 108		Yes	100	2.08374
VP1:LYS 109		Yes	100	1.85264
VP1:ALA 110		Yes	88.64	1.8255
VP1:PRO 111	Antigenic site	Yes	100	0.831625
VP1:PRO 122		Yes	0	0.21719
VP1:HIS 123		Yes	0	0.184855
VP1:LEU 126		Yes	0.15	0.190713
VP1:THR 128		Yes	0	0.340818
VP1:VAL 129		Yes	20	0.317198
VP1:TYR 130		Yes	0	0.509229
VP1:GLY 132		Yes	0	0.496874
VP1:GLU 133		Yes	100	1.08427
VP1:CYS 134		Yes	100	0
VP1:ARG 135		Yes	44.85	N/A
VP1:TYR 136		Yes	0	N/A
VP1:SER 137		Yes	100	N/A
VP1:ARG 138	Antigenic site	Yes	100	N/A
VP1:ASN 139	Antigenic site	Yes	98.03	N/A
VP1:ALA 140		Yes	100	N/A
VP1:VAL 141	Antigenic site	Yes	100	N/A
VP1:PRO 142	Antigenic site	Yes	100	N/A
VP1:ASN 143		Yes	100	N/A
VP1:LEU 144	Antigenic site	Yes	100	N/A
VP1:ARG 145		Yes	63.33	N/A
VP1:GLY 146	Antigenic site	Yes	5.15	N/A
VP1:ASP 147	Antigenic site	Yes	0	N/A
VP1:LEU 148	Antigenic site	Yes	41.82	N/A
VP1:GLN 149	Antigenic site	Yes	92.58	N/A
VP1:VAL 150	Antigenic site	Yes	100	N/A
VP1:LEU 151	Antigenic site	Yes	0.61	N/A
VP1:ALA 152	Antigenic site	Yes	8.94	N/A
VP1:GLN 153	Antigenic site	Yes	41.21	N/A
VP1:LYS 154	Antigenic site	Yes	17.27	N/A
VP1:VAL 155		Yes	100	N/A
VP1:ALA 156	Antigenic site	Yes	23.18	N/A
VP1:ARG 157		Yes	100	0
VP1:THR 158		Yes	100	1.47442
VP1:LEU 159		Yes	6.06	0.531112
VP1:PRO 160		Yes	0	0.584233
VP1:THR 161		Yes	10.76	0.483071
VP1:SER 162		Yes	4.7	0.448617
VP1:LYS 169	Predicted & Antigenic site	Yes	73.33	0.717784
VP1:THR 171	Predicted & Antigenic site	Yes	100	1.55508
VP1:ARG 172	Predicted site	Yes	46.06	1.45091
VP1:VAL 173	Antigenic site	Yes	100	1.48244
VP1:THR 174	Predicted site	Yes	100	1.00133
VP1:GLU 175		Yes	57.73	0.520755
VP1:ARG 189	Predicted site	Yes	3.03	0.444924
VP1:PRO 190	Predicted site	Yes	27.27	0.361228
VP1:LEU 191	Predicted site	Yes	6.97	0.403821
VP1:LEU 192	Predicted site	Yes	6.52	0.400642
VP1:ILE 194	Predicted site	Yes	94.24	2.02271
VP1:HIS 195	Predicted site	Yes	100	0.701302
VP1:PRO 196	Predicted site	Yes	100	1.64497
VP1:THR 197	Predicted site	Yes	100	2.09505
VP1:GLU 198	Predicted & Antigenic site	Yes	97.73	1.15164
VP1:ALA 199	Predicted site	Yes	100	1.12071
VP1:ARG 200	Predicted site	Yes	0	0.979424
VP1:HIS 201		Yes	100	0.760855
VP1:LYS 202		Yes	49.85	0.527203
VP1:GLN 203		Yes	25.45	0.589588
VP1:LYS 204	Predicted & Antigenic site	Yes	100	0.514198
VP1:ALA 207		Yes	23.94	0.6942
VP1:PRO 208	Antigenic site	Yes	100	0.847981
VP1:VAL 209	Antigenic site	Yes	48.03	0.875024
VP1: LYS 210	Antigenic site	Yes	0.45	2.00158
VP2:PHE 62		Yes	0.45	0.518473
VP2:THR 64		Yes	100	0.765422
VP2:HIS 65		Yes	100	0.624763
VP2:LEU 66		Yes	0.76	0.383499
VP2:PHE 67	Antigenic site	Yes	7.58	0.473664
VP2:ASP 68	Predicted site	Yes	18.64	0.370694
VP2:VAL 70	Predicted & Antigenic site	Yes	61.52	0.453668
VP2:THR 71	Predicted & Antigenic site	Yes	100	0.53004
VP2:SER 72	Predicted & Antigenic site	Yes	100	0.366177
VP2:ASP 73	Predicted site	Yes	100	0.400357
VP2:SER 74	Predicted & Antigenic site	Yes	0	0.642373
VP2:PHE 75	Predicted & Antigenic site	Yes	1.21	0.342574
VP2:GLY 76		Yes	10.91	0.367579
VP2:ARG 77	Antigenic site	Yes	100	0.299476
VP2:CYS 78		Yes	100	0.332931
VP2:HIS 79	Antigenic site	Yes	100	0.259119
VP2:LEU 80	Antigenic site	Yes	100	0.588303
VP2:LEU 81		Yes	3.18	0.912915
VP2:GLU 82		Yes	12.73	0.296816
VP2:PRO 84		Yes	0	0.861121
VP2:THR 85		Yes	40.15	1.04558
VP2:ASP 86		Yes	62.42	0.705094
VP2:HIS 87		Yes	46.21	1.05393
VP2:LYS 88		Yes	29.7	1.10876
VP2:GLY 89		Yes	0	0.593476
VP2:VAL 90		Yes	0.3	0.521687
VP2:GLY 92		Yes	0	0.623676
VP2:SER 93		Yes	100	0.645645
VP2:THR 95		Yes	74.24	0.804106
VP2:ASP 96		Yes	58.79	0.866644
VP2:SER 97		Yes	4.24	0.669168
VP2:ALA 99		Yes	8.03	0.430066
VP2:LEU 129		Yes	100	1.06711
VP2:CYS 130		Yes	100	1.38236
VP2:SER 131	Antigenic site	Yes	66.97	1.25146
VP2:ILE 132	Antigenic site	Yes	49.7	0.726036
VP2:GLN 133		Yes	100	0.584734
VP2:LYS 134	Predicted & Antigenic site	Yes	100	0.581292
VP2:ARG 135		Yes	0	0.494585
VP2:GLU 136		Yes	14.7	0.469574
VP2:LEU 137		Yes	100	0.35432
VP2:TYR 138		Yes	17.73	0.279464
VP2:ASN 166		Yes	37.42	0.360317
VP2:GLN 170		Yes	3.18	1.47516
VP2:TYR 171		Yes	100	1.94497
VP2:LYS 172		Yes	50.91	1.80006
VP2:VAL 173		Yes	72.73	1.16117
VP2:HIS 174		Yes	0	0.458912
VP2:LYS 175		Yes	14.7	1.00383
VP2:THR 178		Yes	2.27	0.422729
VP2:PRO 186	Predicted site	Yes	0	0.244774
VP2:LEU 187	Predicted site	Yes	45.91	0.343615
VP2:THR 188	Predicted & Antigenic site	Yes	0	0.463974
VP2:VAL 189	Predicted site	Yes	55.76	1.10261
VP2:ASN 190	Predicted site	Yes	88.48	1.16418
VP2:THR 191	Predicted site	Yes	60.61	1.34359
VP2:GLU 192	Predicted site	Yes	100	0.881063
VP2:GLY 193	Predicted site	Yes	74.7	0.681417
VP2:PRO 195	Predicted site	Yes	100	0.636722
VP2:GLN 196	Predicted & Antigenic site	Yes	31.52	0.364339
VP2:LYS 198		Yes	38.48	0.430332
VP2:PRO 215		Yes	0	1.73464
VP2:SER 216		Yes	23.33	2.3466
VP2:LYS 217		Yes	0	2.3777
VP2:GLU 218		Yes	7.88	1.79258
VP3:GLY 01		Yes	0	0.347707
VP3:ILE 02		Yes	0	0.488599
VP3:CYS 07		Yes	100	0.482183
VP3:SER 08		Yes	21.36	0.572501
VP3:ASP 09		Yes	29.55	0.534643
VP3:ARG 56		Yes	100	0.513587
VP3:PHE 57		Yes	0	0.473422
VP3:GLU 58	Predicted & Antigenic site	Yes	100	1.8069
VP3:GLY 59	Predicted & Antigenic site	Yes	100	0.812917
VP3:GLY 60	Predicted site	Yes	100	0.594943
VP3:VAL 61	Predicted & Antigenic site	Yes	60	0.418535
VP3:TYR 63		Yes	5.45	0.403219
VP3:VAL 64		Yes	0	0.453636
VP3:THR 65		Yes	64.24	0.581758
VP3:THR 66	Predicted site	Yes	0	1.41594
VP3:LYS 67	Predicted site	Yes	45.76	1.85346
VP3:THR 68	Predicted site	Yes	87.58	1.01124
VP3:ASP 69	Predicted & Antigenic site	Yes	100	2.38655
VP3:SER 70	Predicted & Antigenic site	Yes	100	1.35639
VP3:ASP 71	Predicted & Antigenic site	Yes	100	0.75389
VP3:ARG 72		Yes	5.15	0.571452
VP3:VAL 73		Yes	19.24	0.583058
VP3:LEU 74		Yes	11.36	0.483898
VP3:ALA 75		Yes	13.33	0.412137
VP3:GLN 76		Yes	100	0.408464
VP3:PHE 77		Yes	13.33	0.450761
VP3:ASP 78		Yes	0	0.408639
VP3:LYS 84		Yes	63.79	0.653933
VP3:HIS 85		Yes	100	0.550156
VP3:GLN 9		Yes	35.3	0.514504
VP3:ASP 116	Predicted site	Yes	100	0.488949
VP3:ALA 117		Yes	88.64	0.560688
VP3:GLY 129		Yes	5.15	1.00609
VP3:MET 130		Yes	95.15	1.3837
VP3:GLU 131		Yes	100	2.45552
VP3:PRO 132		Yes	100	1.51037
VP3:PRO 133		Yes	5.15	1.08161
VP3:LYS 134		Yes	91.06	1.02624
VP3:THR 135	Predicted & Antigenic site	Yes	63.94	0.889807
VP3:PRO 136		Yes	0	0.894028
VP3:GLU 137		Yes	3.48	0.949571
VP3:ALA 138		Yes	100	0.910941
VP3:SER 163		Yes	0	0.29389
VP3:ALA 164		Yes	11.06	0.289828
VP3:ALA 165		Yes	6.21	0.320424
VP3:TYR 167		Yes	7.58	0.255371
VP3:TYR 169		Yes	0.15	0.313323
VP3:ASP 173		Yes	48.94	0.919456
VP3:VAL 174		Yes	54.55	1.35596
VP3:ALA 175	Antigenic site	Yes	100	1.80418
VP3:GLU 176		Yes	15	1.02892
VP3:THR 177		Yes	45.15	0.54539
VP3:THR 178	Antigenic site	Yes	16.06	0.54539
VP3:ASN 179		Yes	62.58	0.730171
VP3:TRP 183		Yes	0	0.200962
VP3:LYS 193	Predicted site	Yes	100	1.24571
VP3:ASP 195	Predicted & Antigenic site	Yes	100	1.78004
VP3:GLY 196	Predicted site	Yes	100	0.908295
VP3:ASP 197	Predicted site	Yes	100	0.875165
VP3:ALA 198		Yes	12.58	0.299452
VP3:ARG 218	Antigenic site	Yes	31.06	1.52045
VP3:ALA 219	Predicted site	Yes	58.18	0.631051
VP3:GLU 220	Predicted site	Yes	2.58	0.905097
VP1:ALA 193	Antigenic site	Yes	91.21	0.571562
VP1:ILE 205	Predicted site	Yes	3.33	0.535377
VP2:ALA 156	Antigenic site	Yes	2.73	0.303456
VP2:ALA 194	Predicted site	Yes	14.09	0.68237
VP3:THR 112	Predicted site	Yes	0.76	0.39341
VP3:GLY 113	Predicted site	Yes	0	0.352501
VP3:PRO 114	Predicted site	Yes	100	0.344135
VP3:ALA 139	Antigenic site	Yes	0.45	0.735702
VP3:HIS 191	Predicted site	Yes	100	0.678938
VP3:GLY 192	Predicted site	Yes	100	0.562609
VP3:ALA 194	Predicted site	Yes	29.55	0.258505
VP3:LEU 199	Predicted site	Yes	8.94	0.337575
